# Supplementary material for: An all-in-one, Tet-On 3G inducible PiggyBac system for human pluripotent stem cells and derivatives
Source: PubMed Central journal article supplement (PMC5431539; doi:10.1038/s41598-017-01684-6), 2017-05-08
Supplement: 41598_2017_1684_MOESM1_ESM.pdf [file 41598_2017_1684_MOESM1_ESM.pdf]

# **An all-in-one, Tet-On 3G inducible PiggyBac system for human pluripotent stem cells and derivatives**

**Lauren N. Randolph<sup>1,3,#</sup>, Xiaoping Bao<sup>4,#</sup>, Chikai Zhou<sup>5</sup>, Xiaojun Lian<sup>1,2,3,\*</sup>**

<sup>1</sup>Department of Biomedical Engineering, <sup>2</sup>Department of Biology, <sup>3</sup>The Huck Institutes of the Life Sciences, Pennsylvania State University, University Park, PA, 16802, USA

<sup>4</sup>Department of Chemical and Biological Engineering, University of Wisconsin, Madison, WI, 53706, USA

<sup>5</sup>Department of Cell and Molecular Biology, Karolinska Institutet, 17177, Stockholm, Sweden

\* Correspondence should be addressed to: Xiaojun Lian ([Lian@psu.edu](mailto:Lian@psu.edu))

# These authors contributed equally to this work.

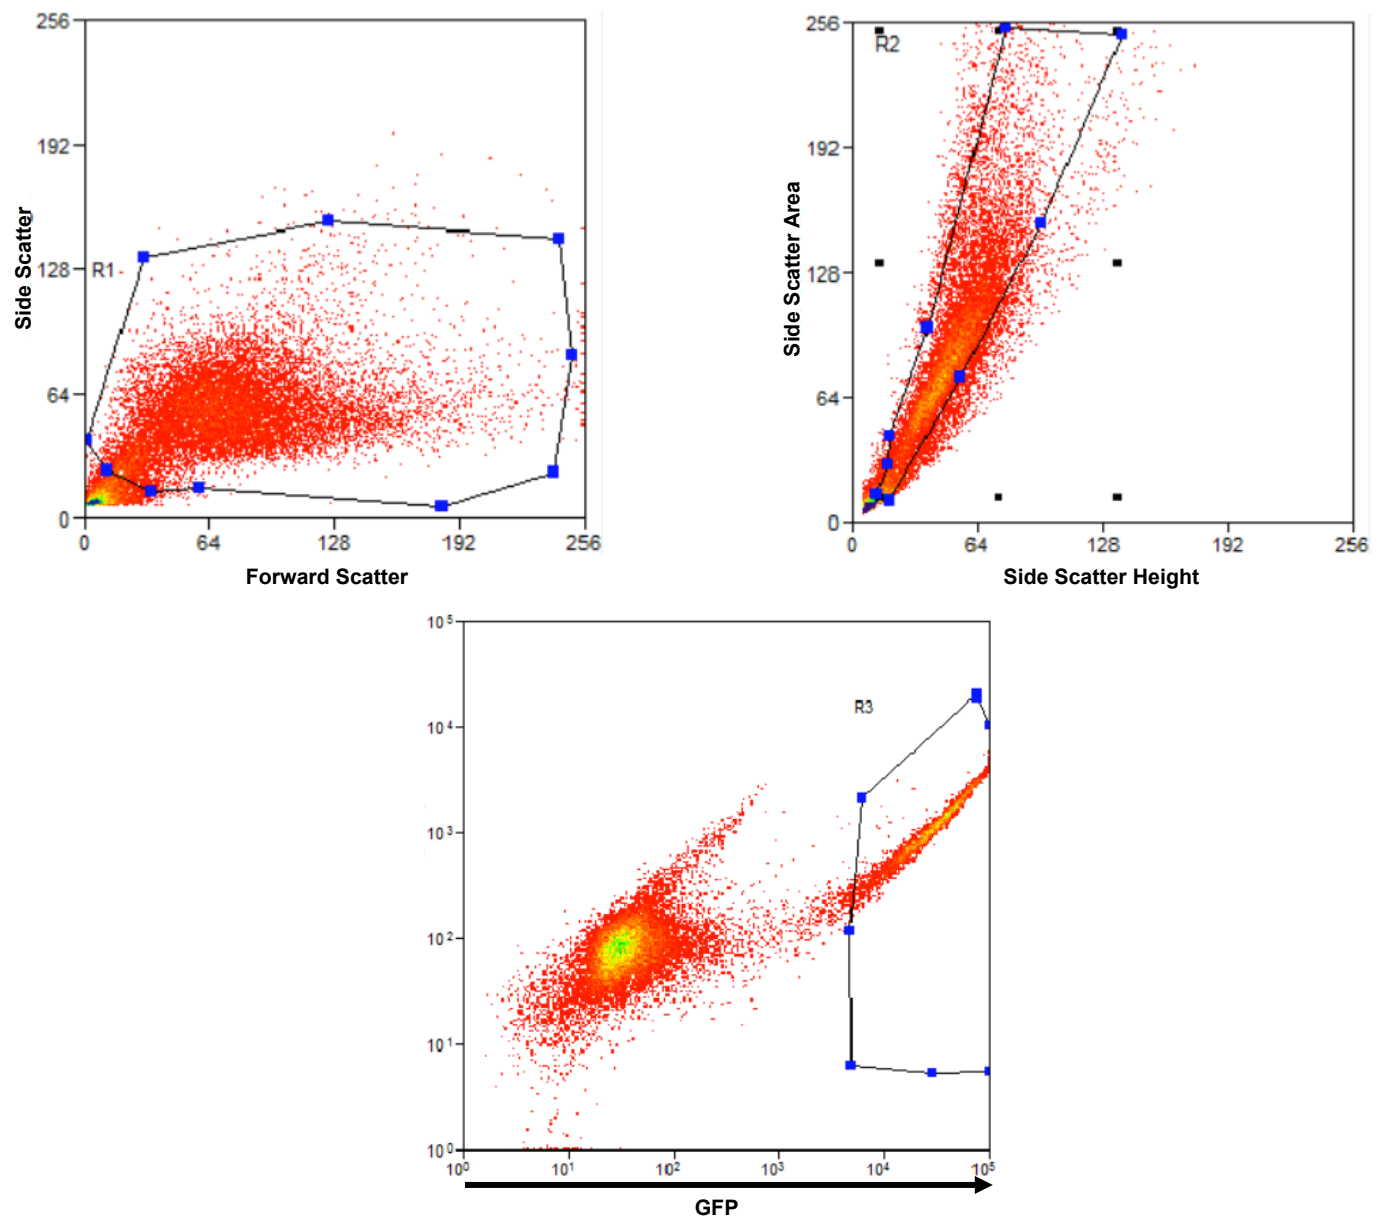

**Supp. Fig. 1:** FACS sort gating for population with highest GFP expression (R3).

**A** Post 2<sup>nd</sup> Bsd Selection

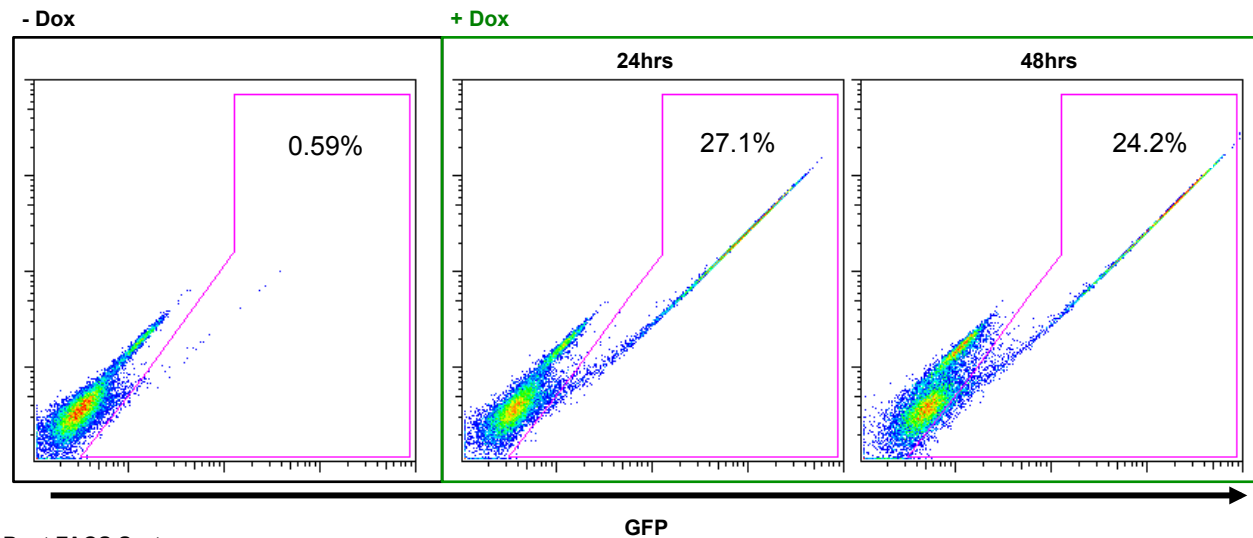

**B** Post FACS Sort

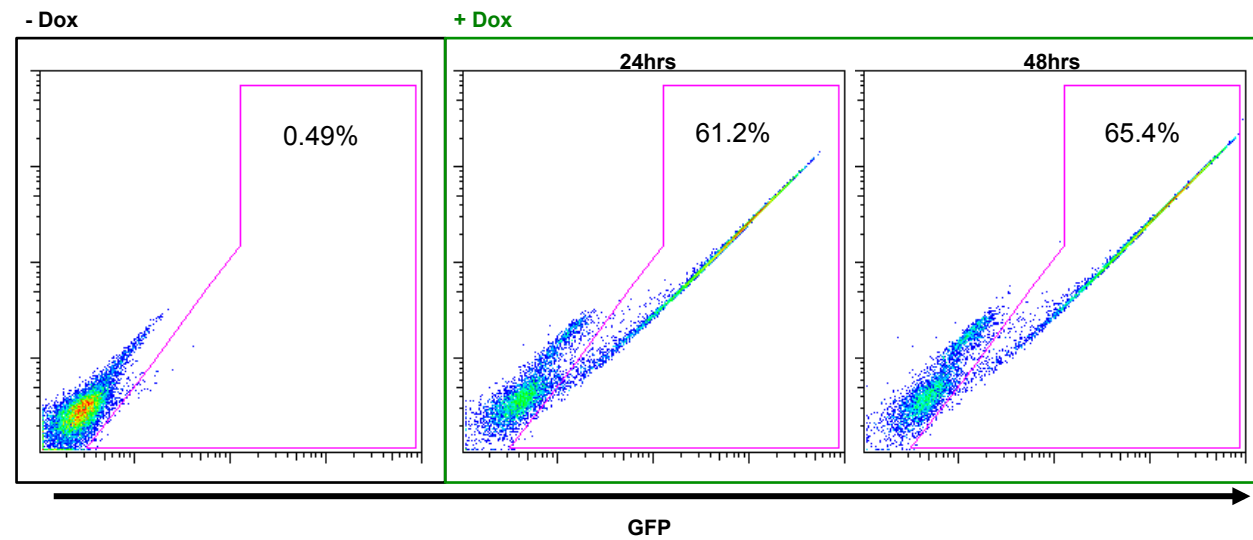

**Supp. Fig. 2:** Comparison of GFP expression at 24 and 48 hours in cells after A) two rounds of Bsd selection and B) FACS sorting.

| <b>Antibody</b>    | <b>Source</b>                                              | <b>Application</b> |
|--------------------|------------------------------------------------------------|--------------------|
| Oct3/4             | Santa Cruz, mouse IgG <sub>2b</sub> , Clone: C-10, sc-5279 | 1:100 (IS)         |
| Nanog              | Thermo Fisher Scientific, rabbit IgG, PA1-097              | 1:500 (IS)         |
| cTnT               | Lab Vision, mouse IgG1, Clone: 13-11, ms: 295-p1           | 1:200 (IS)         |
| SSEA-4             | DSHB, mouse IgG3, MC-813-70                                | 1:20 (IS)          |
| cTnI               | Santa Cruz, rabbit IgG, sc-15368/H-170                     | 1:100 (IS)         |
| Nkx2.5             | Santa Cruz, rabbit IgG, sc-14033/H-114                     | 1:75 (IS)          |
| Secondary Antibody | Alexa 555 Goat anti Rb IgG, A-21428                        | 1:1000             |
| Secondary Antibody | Alexa 647 Goat anti Rb IgG, A-21244                        | 1:1000             |
| Secondary Antibody | Alexa 647 Goat anti Ms IgG, A-21235                        | 1:1000             |

**Supp. Table 1:** Antibodies used in immunostaining analysis.
